# Supplementary material for: Novel Magnetic Inorganic Composites: Synthesis and Characterization
Source: MDPI journal article supplement (doi:10.3390/polym13081284), 2021-04-15
Supplement: s1 [file s1]

## SUPPLEMENTARY MATERIALS

### Novel magnetic inorganic composites: synthesis and characterization

*Marco Natali, Sergio Tamburini, Roberta Bertani, Daniele Desideri, Mirto Mozzon, Daniele Pavarin, Federico Spizzo, Lucia Del Bianco, Federico Zorzi, and Paolo Sgarbossa\**

List of supplementary figures:

- **Figure S1.** Full-scale XRD profile of the **G1** matrix.
- **Figure S2.** Full-scale XRD profile of the **G2** matrix.
- **Figure S3.** Full-scale XRD profile of the isotropic **SrFe<sub>12</sub>O<sub>19</sub>** particles.
- **Figure S4.** Full-scale XRD profile of the anisotropic **SrFe<sub>12</sub>O<sub>19</sub>** particles.
- **Figure S5.** Full-scale XRD profile of the **G1is\_11** composite.
- **Figure S6.** Full-scale XRD profile of the **G1isM\_11** composite.
- **Figure S7.** Full-scale XRD profile of the **G2anis\_6** composite.
- **Figure S8.** Full-scale XRD profile of the **G2anisM\_6** composite.

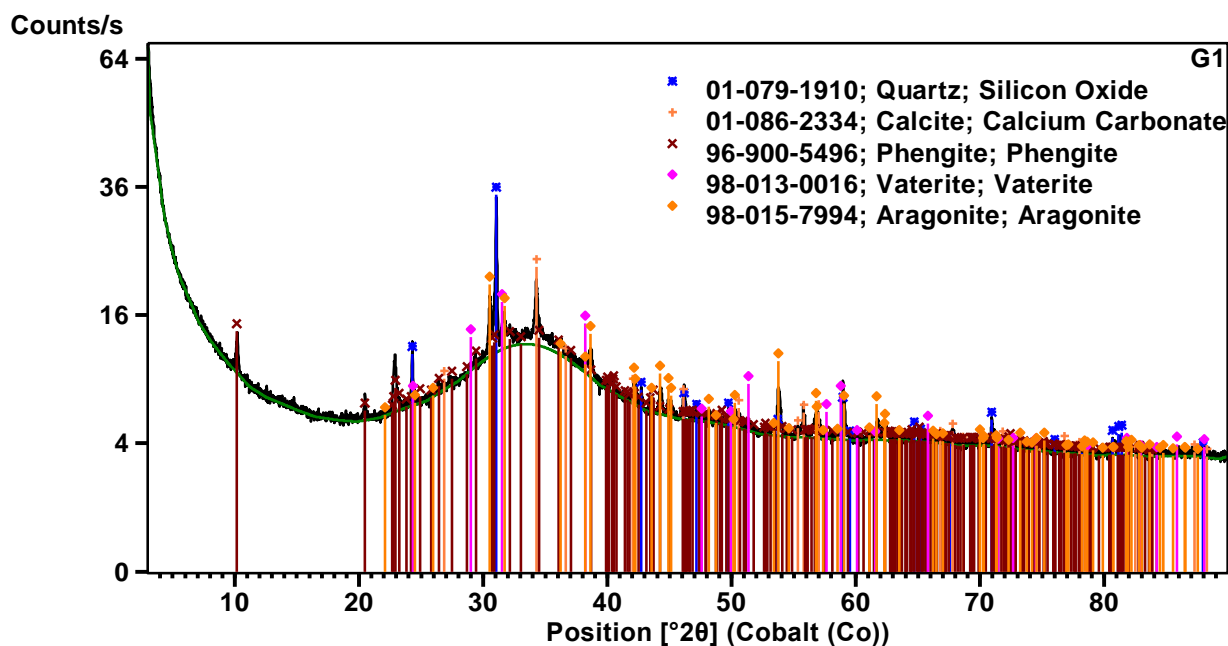

**Figure S1.** Full-scale XRD profile of the **G1** matrix.

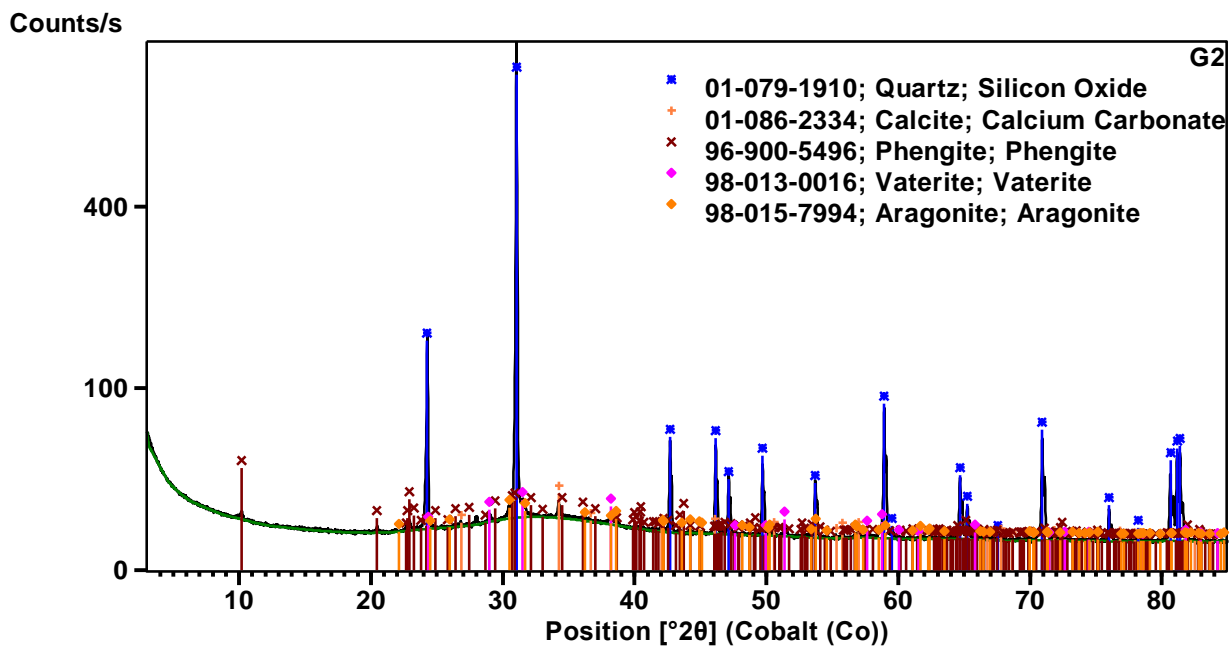

Figure S2. Full-scale XRD profile of the G2 matrix.

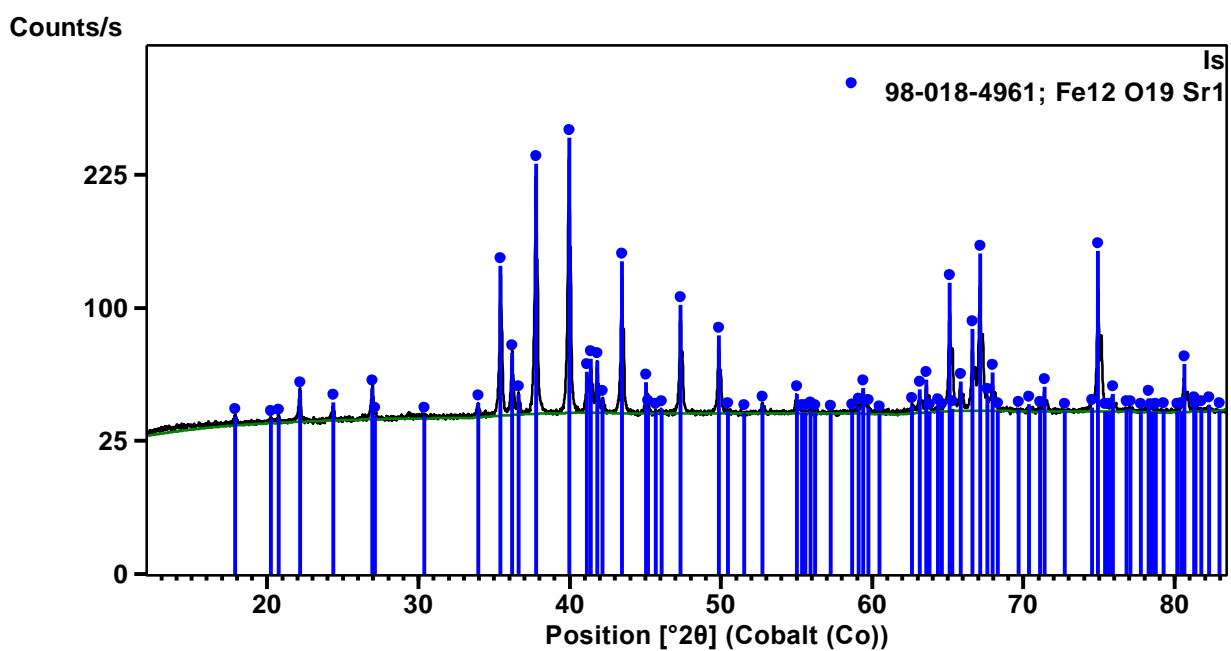

Figure S3. Full-scale XRD profile of the isotropic  $\text{SrFe}_{12}\text{O}_{19}$  particles.

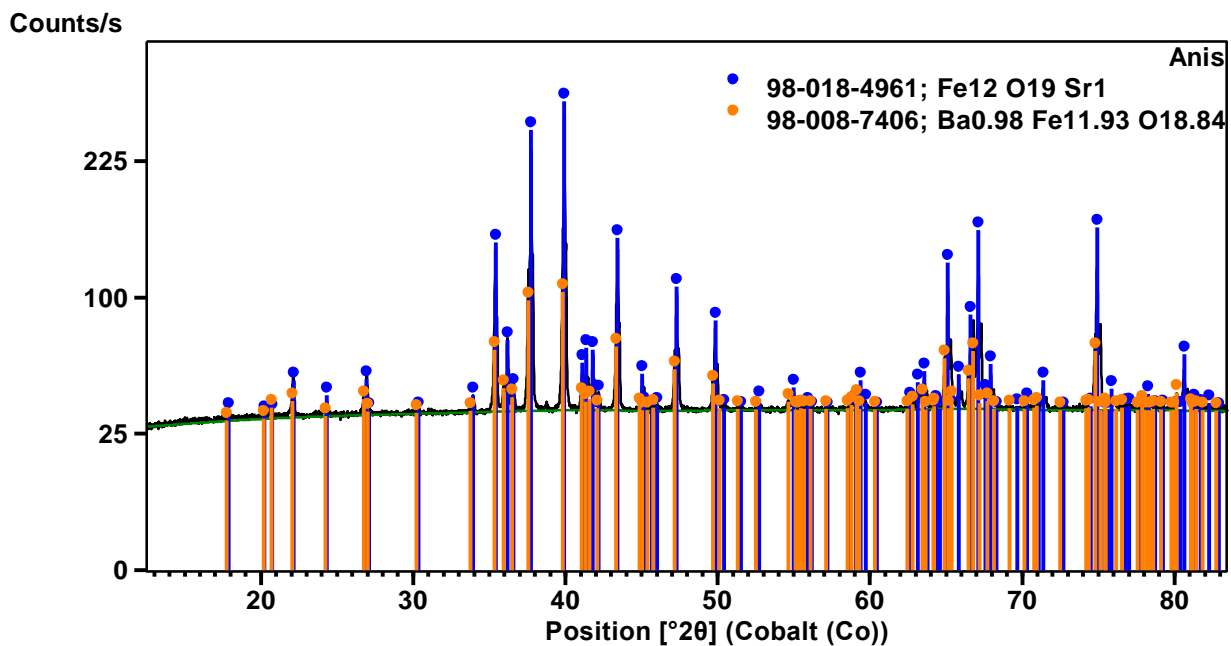

Figure S4. Full-scale XRD profile of the anisotropic SrFe<sub>12</sub>O<sub>19</sub> particles.

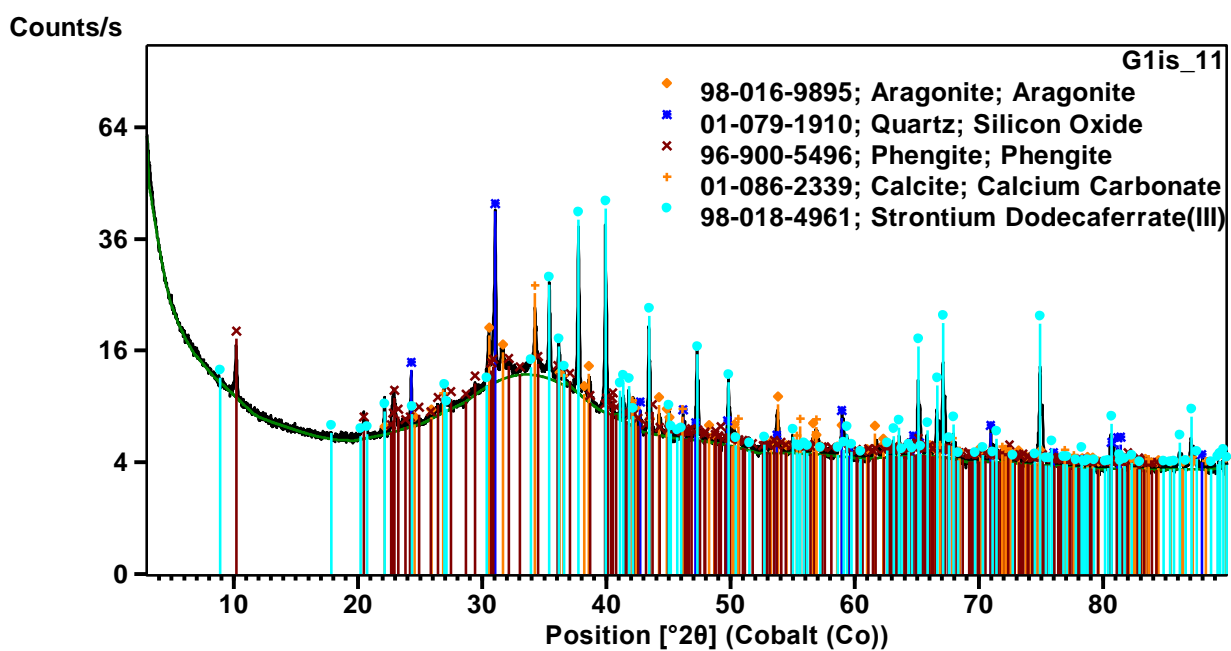

Figure S5. Full-scale XRD profile of the G1is<sub>11</sub> composite.

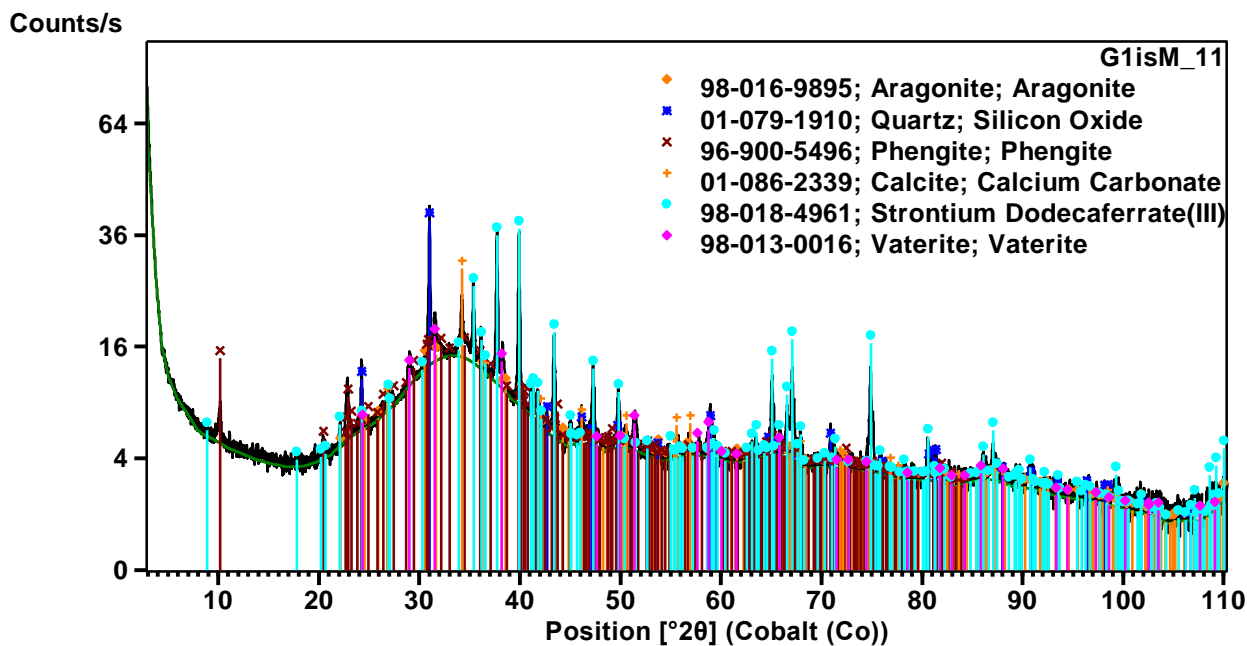

Figure S6. Full-scale XRD profile of the G1isM\_11 composite.

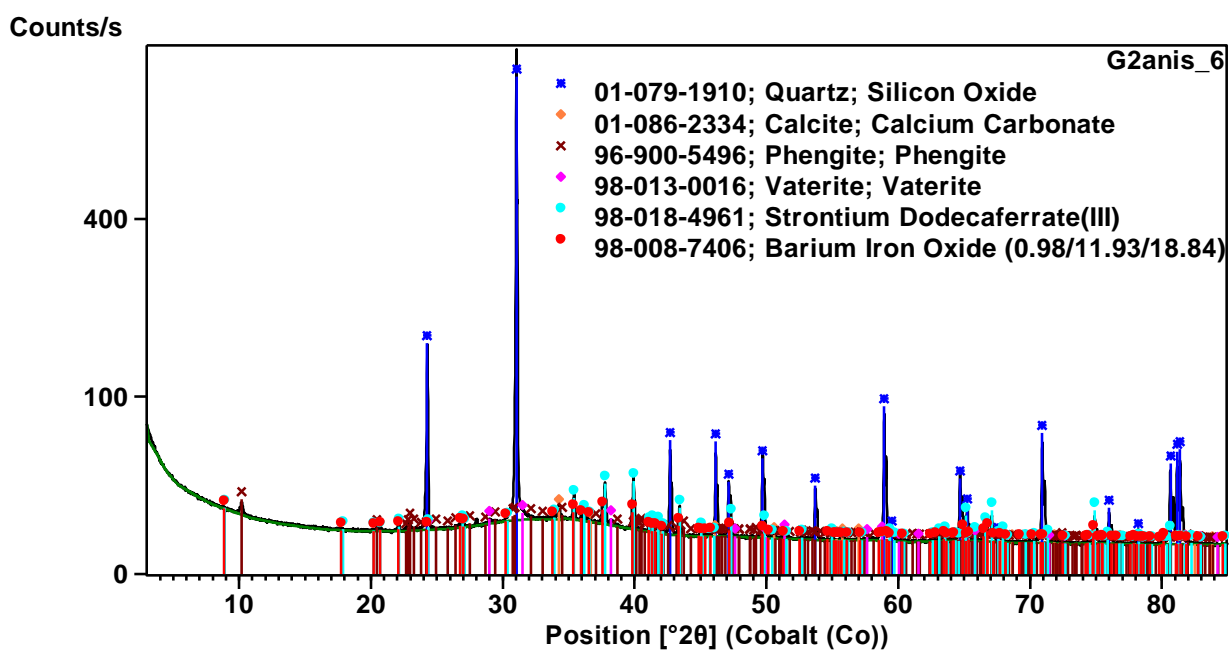

Figure S7. Full-scale XRD profile of the G2anis\_6 composite.

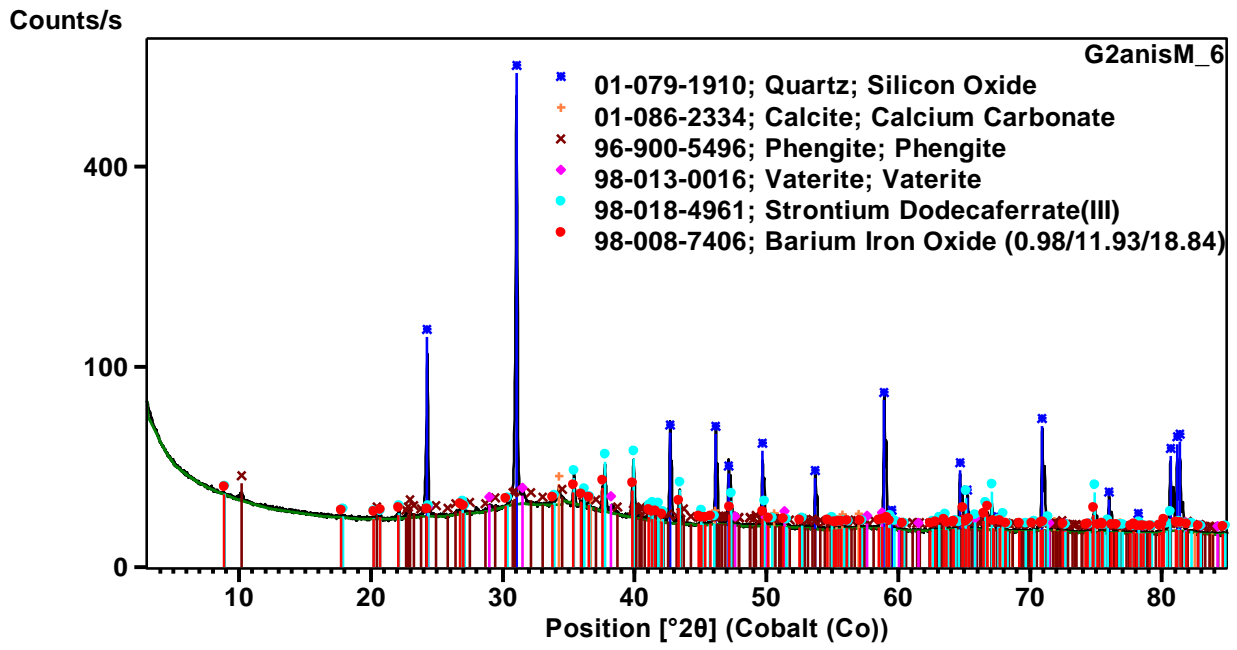

Figure S8. Full-scale XRD profile of the G2anisM\_6 composite.
